# Supplementary material for: The channel catfish genome sequence provides insights into the evolution of scale formation in teleosts
Source: PubMed Central journal article supplement (PMC4895719; doi:10.1038/ncomms11757), 2016-06-02
Supplement: ncomms11757-s1.pdf [file ncomms11757-s1.pdf]

# Supplementary Information

## Supplementary Figures

### Supplementary Figure 1. Estimation of genome size from analysis of k-mers from raw sequence of the Illumina short insert library.

Genome size was calculated as total trusted sequence divided by the multiplicity at the mode. Genome size estimate ranged from 1.008-1.013 Gb. MaSuRCA automatically utilized a kmer length of 31 which produced a genome size estimate of 1.008 Gb based on 88.7 Gb of trusted sequence. In comparison, the genome size estimated from 5.1 Gb of trusted 31-mer sequence from the Illumina-corrected PacBio sequence was 1.021 Gb.

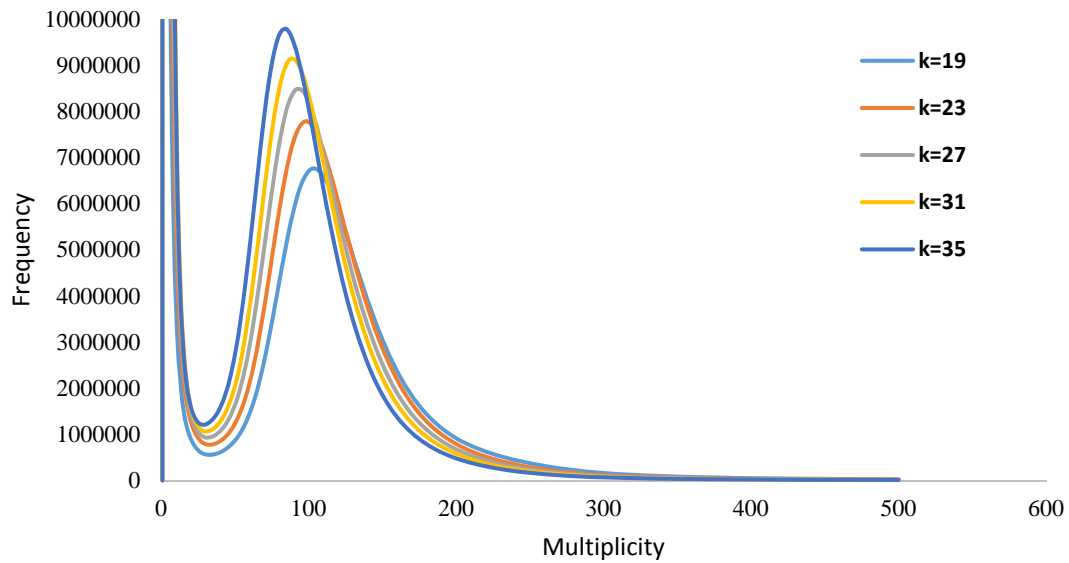

**Supplementary Figure 2a. Concordance of assembled scaffolds with genetic map for chromosomes 1-6. Scaffolds spanning > 3 cM with minimal overlap are included in plots.**

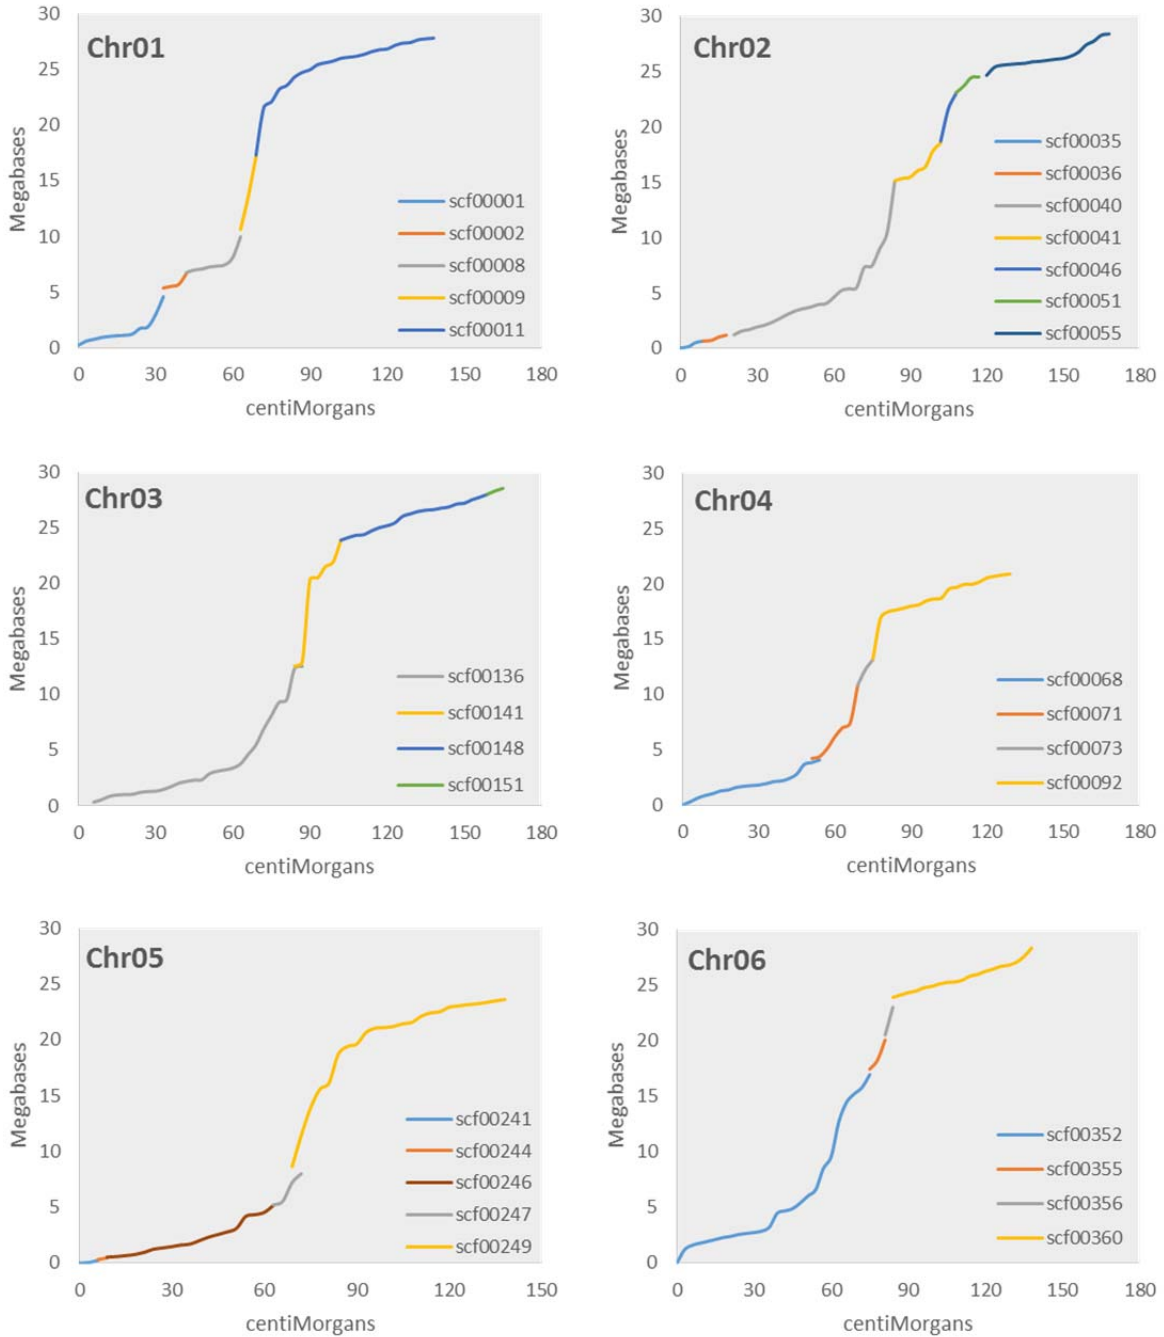

**Supplementary Figure 2b. Concordance of assembled scaffolds with genetic map for chromosomes 7-12. Scaffolds spanning > 3 cM with minimal overlap are included in plots.**

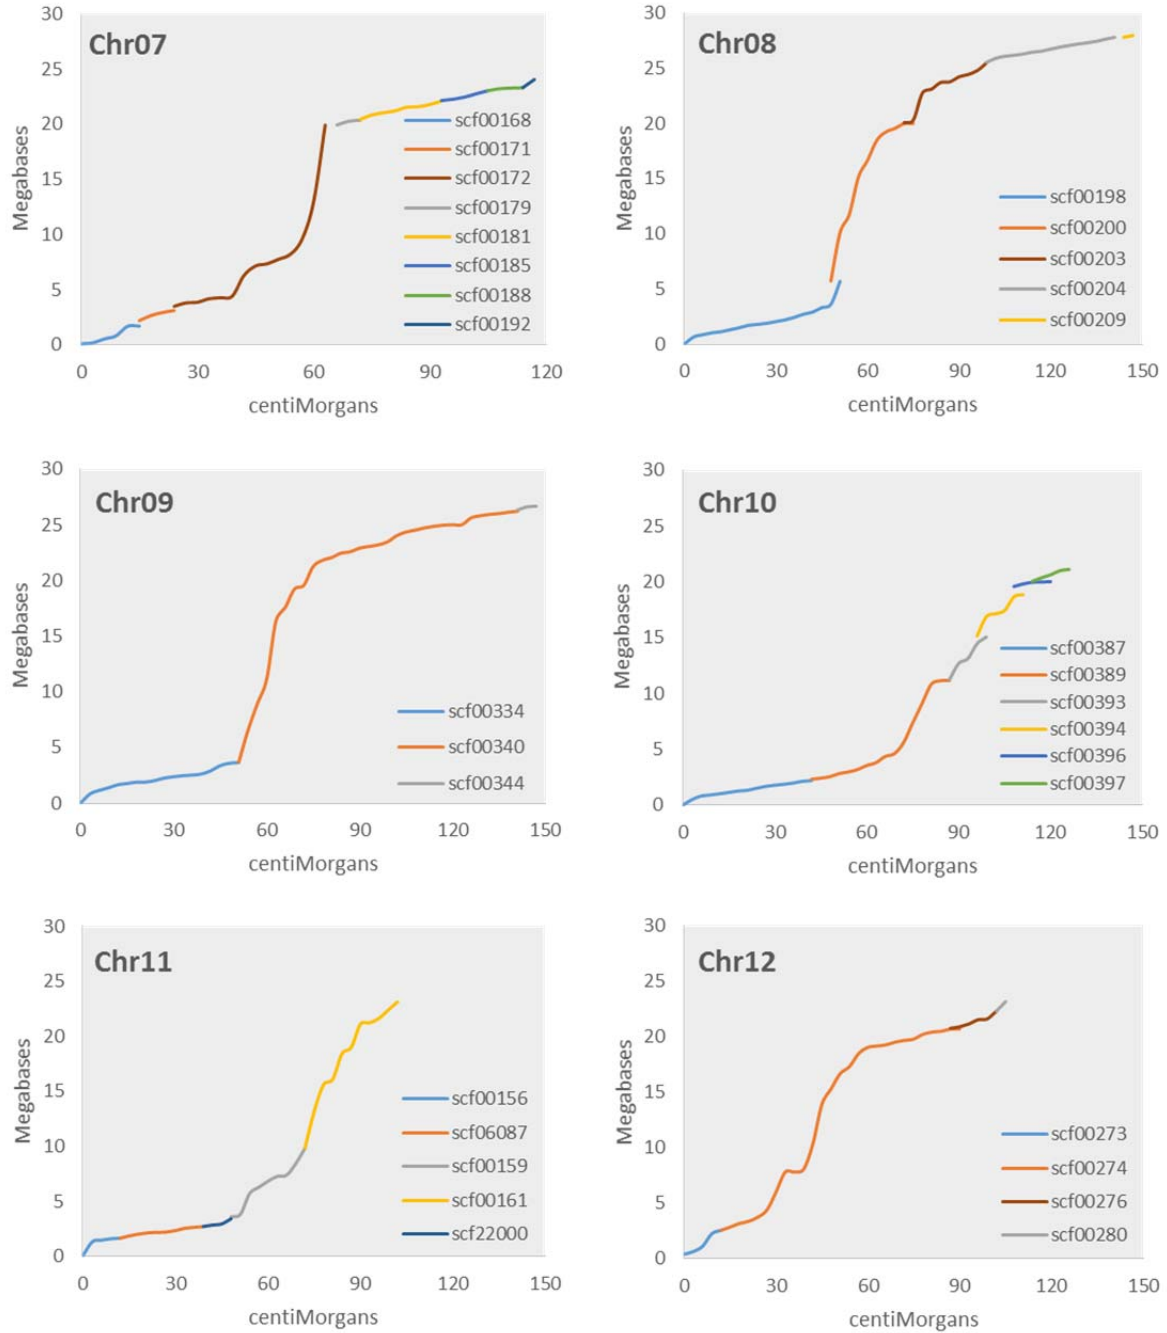

**Supplementary Figure 2c. Concordance of assembled scaffolds with genetic map for chromosomes 13-18. Scaffolds spanning > 3 cM with minimal overlap are included in plots.**

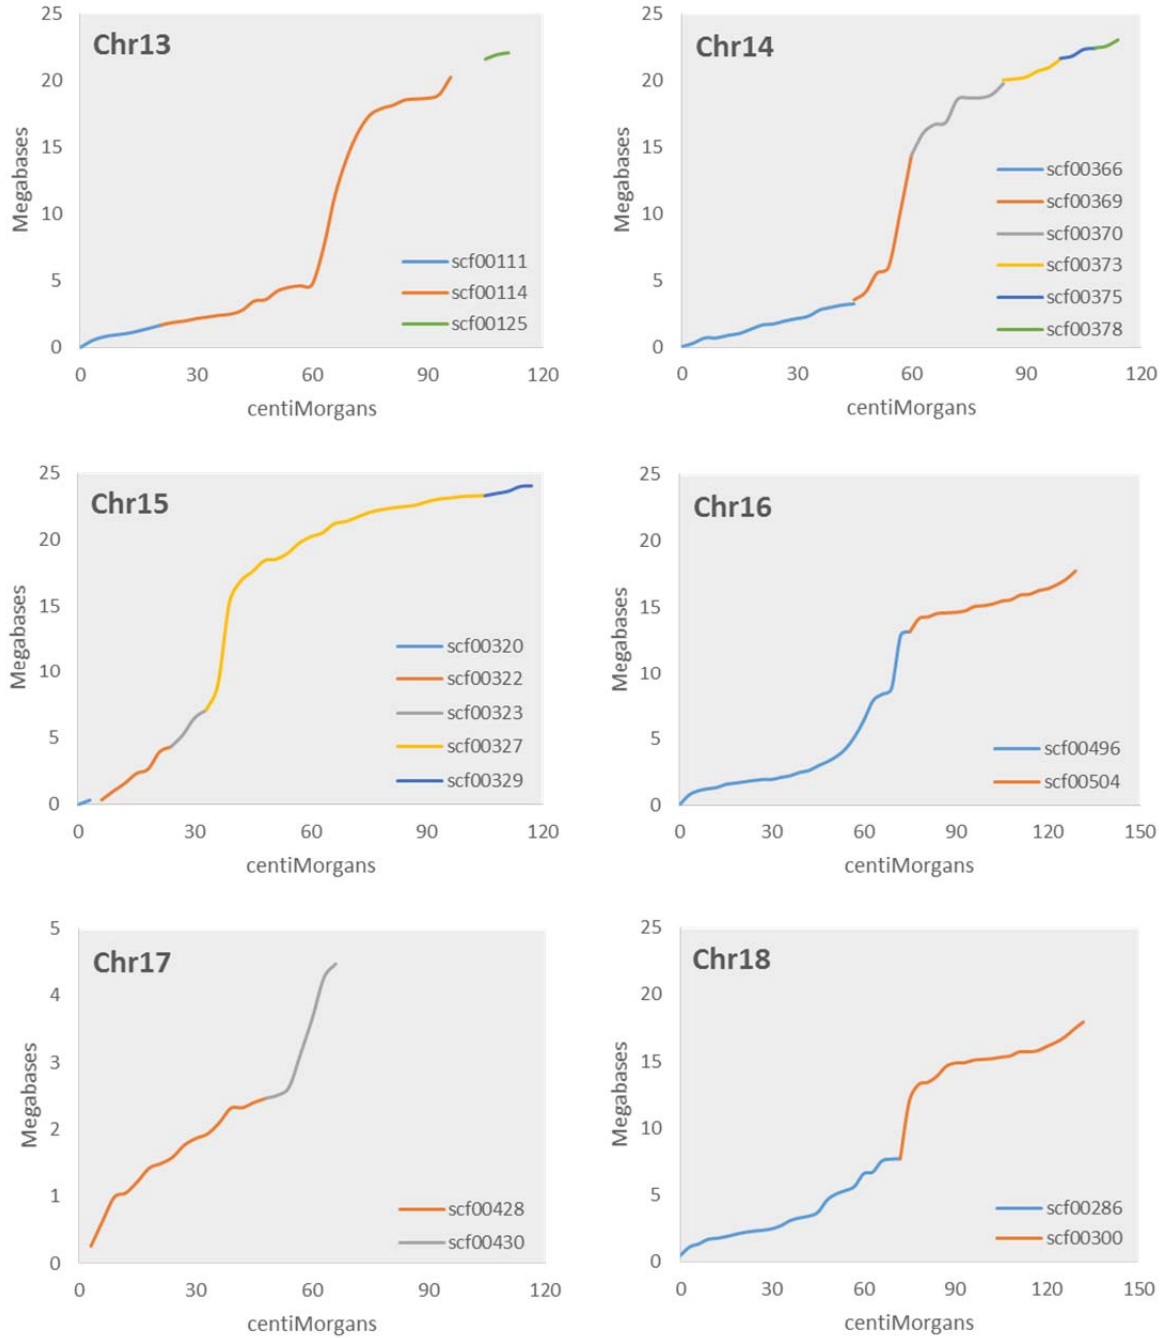

**Supplementary Figure 2d. Concordance of assembled scaffolds with genetic map for chromosomes 19-24. Scaffolds spanning > 3 cM with minimal overlap are included in plots.**

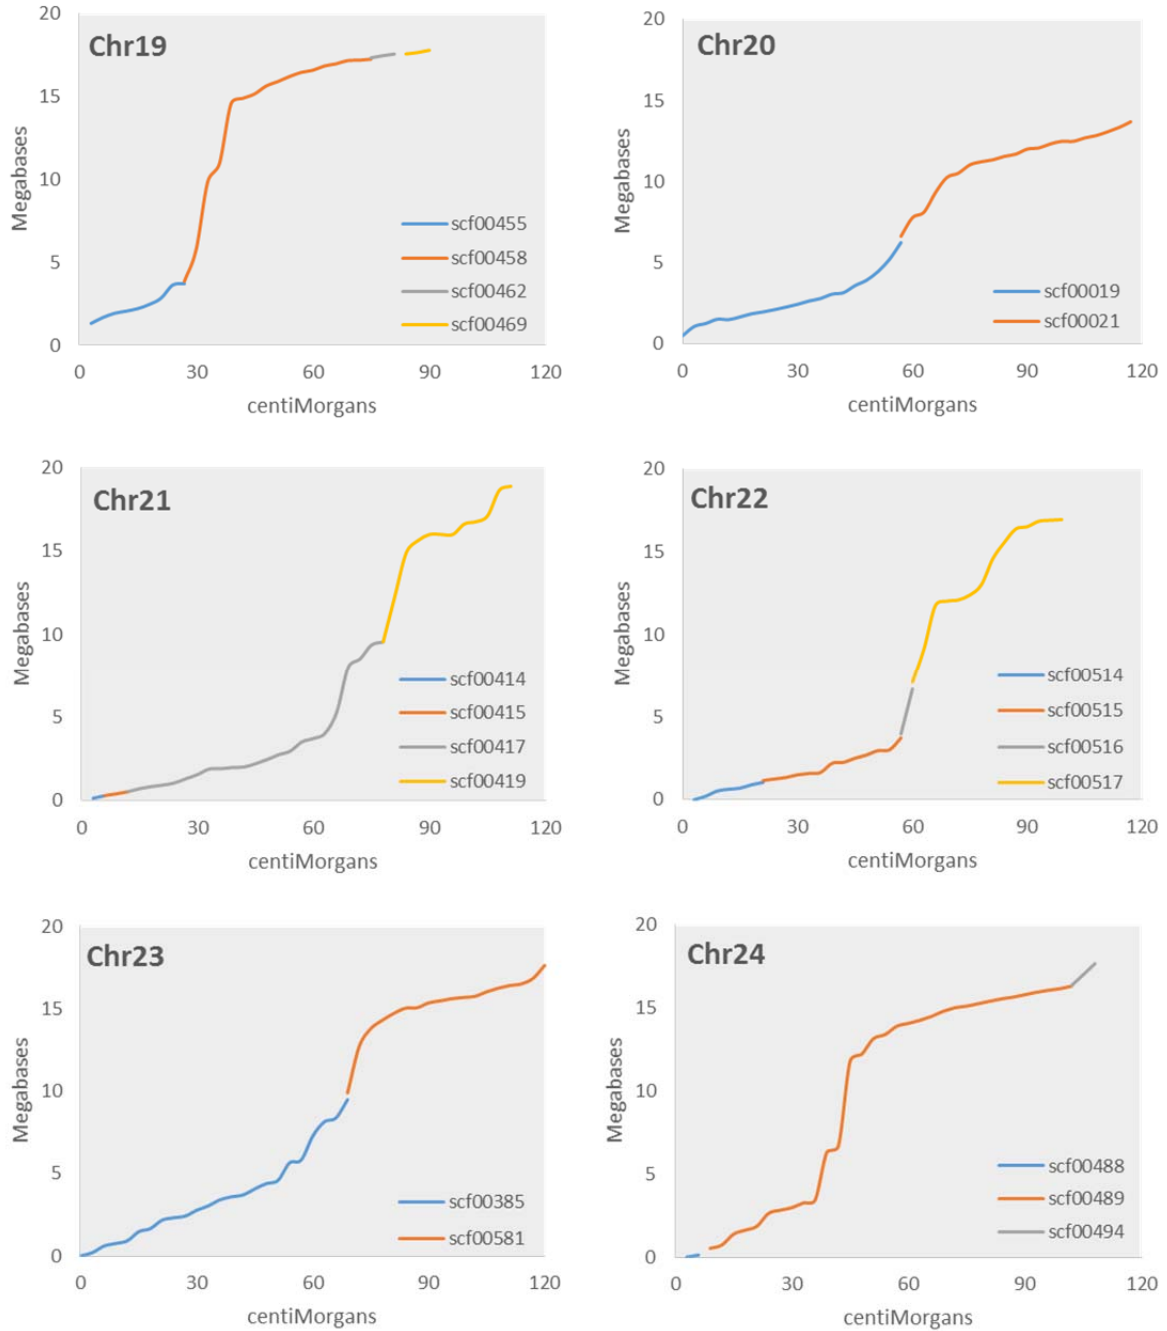

**Supplementary Figure 2e. Concordance of assembled scaffolds with genetic map for chromosomes 25-29. Scaffolds spanning > 3 cM with minimal overlap are included in plots.**

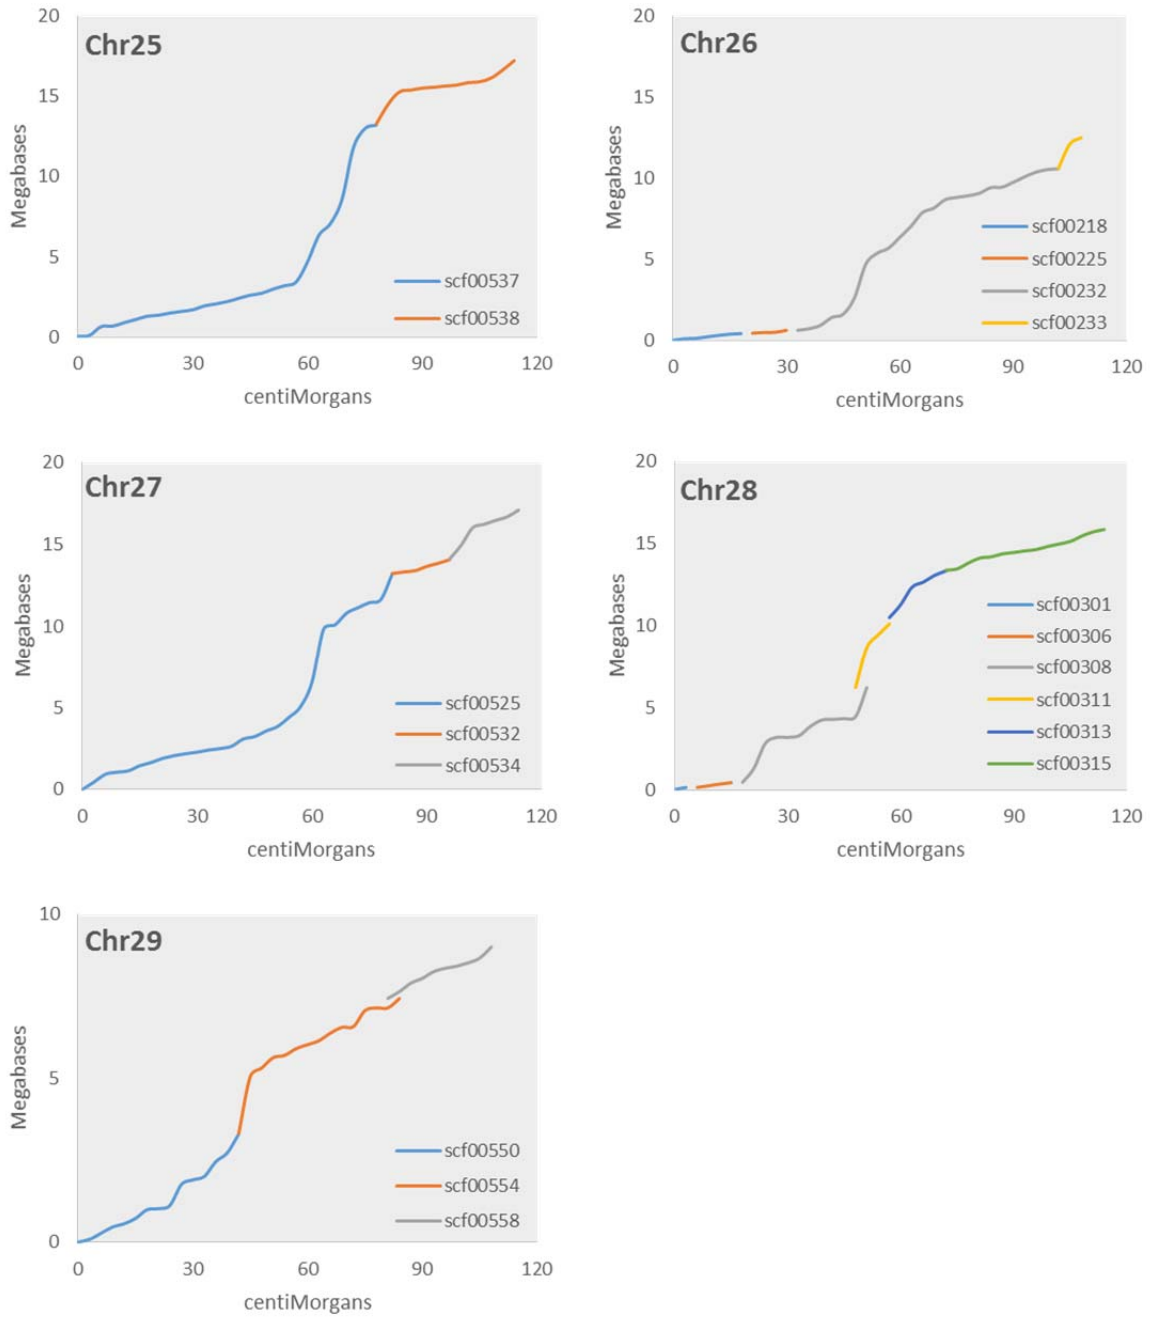

**Supplementary Figure 3. Alignments of 167X genome coverage of reads from re-sequencing of 150 individuals.**

Note that the reference genome is fully covered by the assembled contigs of the re-sequencing reads.

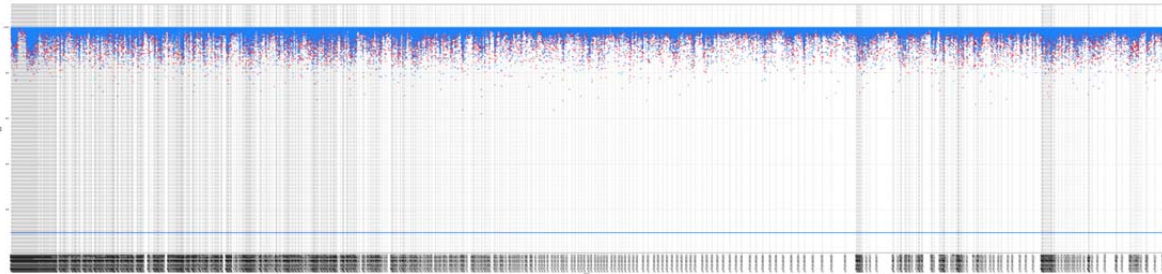

Supplementary Figure 4. Analysis pipeline for the coding potential of the channel catfish genome.

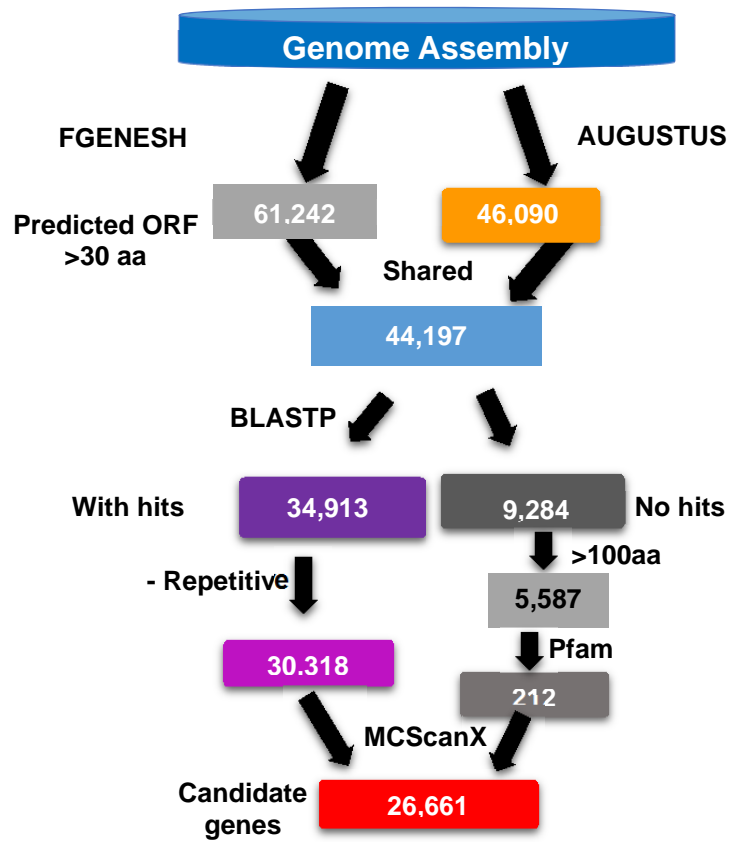



**Supplementary Figure 5. Chromosome (chr) length in Mb (A), distribution of genes (B), single nucleotide variations (C), and teleost-specific genes when compared with tetrapods (D, outward red lines) and when compared with cartilaginous fish (D, inward blue lines), across the channel catfish genome. For B, C, and D, the x-axis corresponds to chromosomal locations as depicted in A, while the Y-axis represents number of genes in B, number of SNPs in C, and teleost-specific genes in D.**

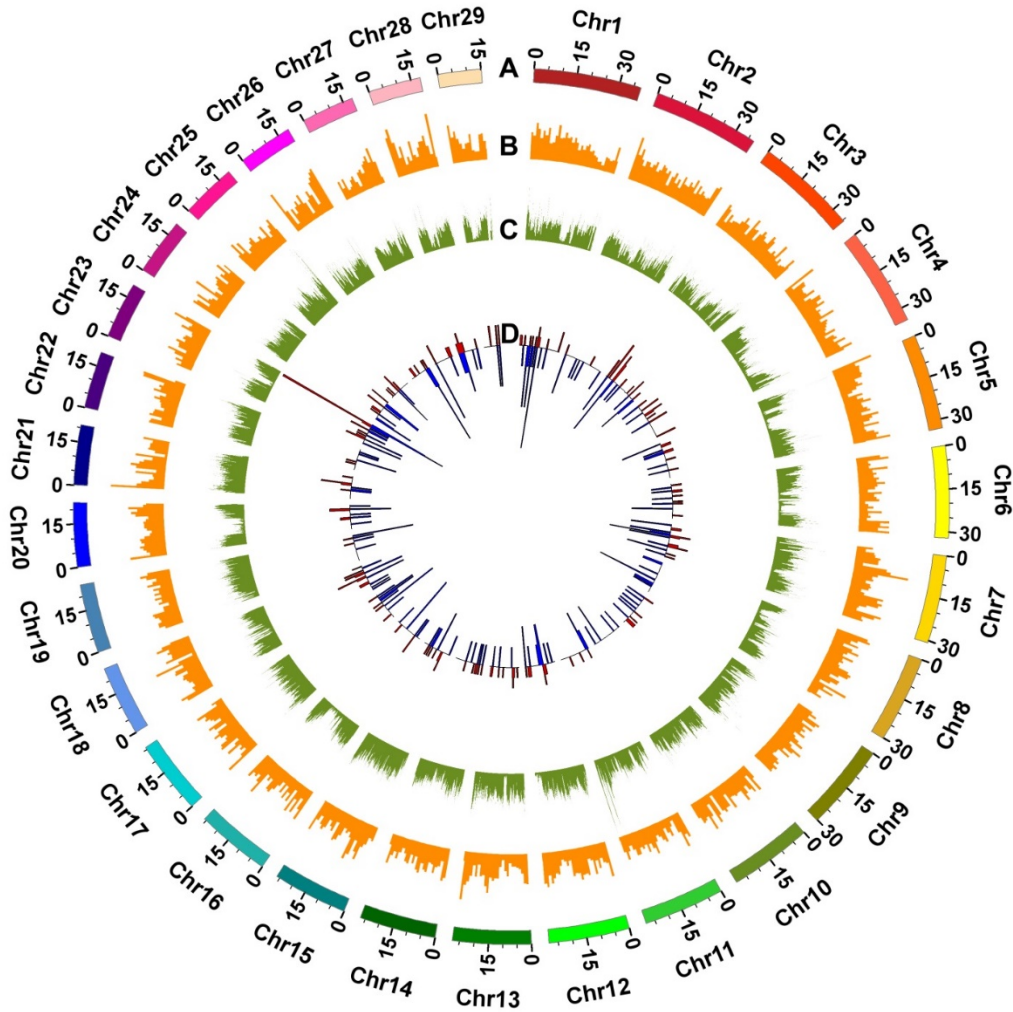

**Supplementary Figure 6. Analysis of orthologies of channel catfish and zebrafish genes.**

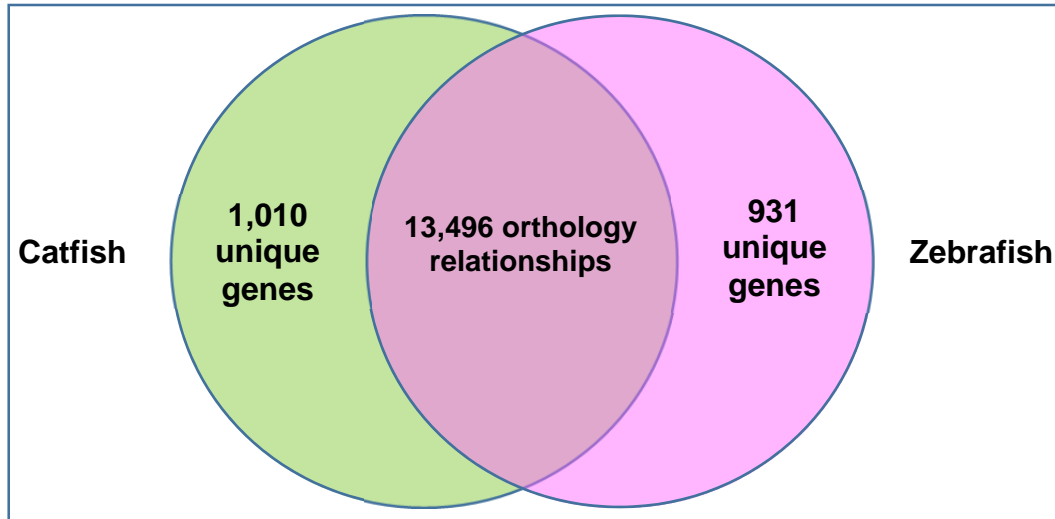

**Supplementary Figure 7. Sequence alignment of Eda of channel catfish (channel) with that of zebrafish.**

```

channel      ----MGSVTESPEESAS----KPAVKCVCQSRCGGGGGGSWKAFAGLFALSALHLVTL 51
zebrafish   MLIDLHAAMEPKREPAKLEERERTQAACECQSQCN-----NCKIFLSLFILSLSLHLVTL 55
           : . * . * * . : . . * * * * . . * * . * * * * * * *
channel     ACYVELRSEVEREIRIQK----SGSG-----AEAPPVPARGGGGGGEVHEQIRVEREAE- 101
zebrafish   FCYLDLRSELKREISQKNKDEVSSTGPVPHYEATEPVLQSPDTHPTIGDQSRWRDEHTR 115
           * * : * * * : * * * * : : * . : * * : * * * * * *
channel     --EKIILRSKRSESPGNGKRKGERKKGKKGPPGAPGPPGPPGPPGPPGPPGIPGIPGSNA 159
zebrafish   GLERVHRTRKRSER--NGKKKGERKKGKKGPPGAPGPPGPPGPPGPPGIPGIPGIPGSNA 173
           * : * * * * * : * * * * * * * * * * * * * * * * * * * * *
channel     MGP---PGPPGAGPPPGPPGAQGTGGGERSRFRDTQLAVVHLQGETTIQVKEDLS 216
zebrafish   MGPSGPPGPPGPPGPPGPPGPPGPPGPPGPPGPPGPPGPPGPPGPPGPPGPPGPPGPPGPP 232
           * * * * * * * * * * * * * * * * * * * * * * * * * * * *
channel     EGVLKNWKTIAMHQRVFKMHSRSGELEVLQDGMFYFIYSQVEVYFLNFTDIASYEVMIDKD 276
zebrafish   EGVLKNWRMISIHQRVFKMHSRSGELEVLLDGTYFIYSQVEVYYLNFTDIASYEVMVDKT 292
           * * * * * : * : * * * * * * * * * * * * * * * * * * * * *
channel     PFLRCTRSIETGQRKFNTCYTAGVCWLRARQRISIRMVYDDTSISMNHTTFLGSIRLGE 336
zebrafish   PFLRCTRSIETGQRKFNTCYTAGVCLLRARQRISIRMVYEDTSISMNHTTFLGSIRLGD 352
           * * * * * : * : * * * * * * * * * * * * * * * * * * * *
channel     APPSGHS 343
zebrafish   APSAGHT 359
           * * . : * * :

```

**Supplementary Figure 8. Sequence alignment of Edar of channel catfish (channel) with that of zebrafish.**

|           |                                                                |     |
|-----------|----------------------------------------------------------------|-----|
| channel   | MARKIPRVESCLLSFLLASSVYPLRAEYSSCGENEFYNHSSSSCRPCPCQCPGQEPYMNC   | 60  |
| zebrafish | MGHKGGRTPSFLLHFLLVSSMSTVSAEYSSCGENEFYNHHTSSCQPCPCQAGQEPYMNC    | 60  |
|           | *.:* * . * ** ** .*: .: *****:****:*****.*****                 |     |
| channel   | GYGVKDEDYDCVSCPPGKFSRGKYEICRRHKDCNALYKATVLTPTGTRSDAECGACLPGY   | 120 |
| zebrafish | GYGTKDDDYSCVSCPAGKFSKGYEICRRHKDCDALYRATVLTPTGTSDDAECGHCLPGY    | 120 |
|           | ***.***:*.*****.***:*****:****:***** :***** *****              |     |
| channel   | FILENRLRNIYSMMCHSCQNAPRNTKECMRTTSTSTKHVPGIPSTSTTTFPHAQKDPTGQ   | 180 |
| zebrafish | YIQENRPQNIYGMVCHSCQNAPRNIKECMRSTPPASGRAPSVSSSSTTIFPQPEKDPTGQ   | 180 |
|           | :* *** :**.*:***** *****:*.:.: .*.:.:*** **.:*****             |     |
| channel   | GHLATALIIAMSTIFIMAIAIVMIIMFYILKAKTSGQACCSGQIVKTI EAPM NKQEEKKE | 240 |
| zebrafish | GHLATALIIAMSTIFIMAIAIVMIIMFYILKSKPSGPVCCSGQLIKAVEAQTNMQEEKKE   | 240 |
|           | *****:***.*** *****:*** * *****                                |     |
| channel   | AQENAVIFTEKDEF---KPPPTKAVKSENDASSENEQLLSRSIDSDEEAAQEKQGATDLC   | 297 |
| zebrafish | AQENVVIFQEKDEFDKLPSSPKTAKSENDASSENEQLLSRSIDSDEEAAQDKQGAADLC    | 300 |
|           | ****.*** ***** *.:.:*****:****:***                             |     |
| channel   | LLSLVHLTRDKTCSNNTVSTTVNNNNNCSNNSRTMGIHSRRKKILELYAKACGVAEGVS    | 357 |
| zebrafish | LLSLVHLTRDKXCX---TNTINNNNNHCS---RATGIHSRRKKILDLYTKACSV AEGLS   | 353 |
|           | ***** * :.*****:*** *: *****:***:***.***:*                     |     |
| channel   | PVELPFDCLERTSRMLSTYSAEKALVRTWRHLAESFGLKRDEIGGMTDGMQLFDRVSTA    | 417 |
| zebrafish | PTEL PFDCLERSXMLSATYSTDKAVVKTWRHLAESFGLKRDEIGGMTDGMQLFDRISTA   | 413 |
|           | *.*****:* ***:***:***:*****:****:***                           |     |
| channel   | GYSIPDLLARLVQIERLDVVEALCFDILGAPPSGQHLTISSRCASV                 | 463 |
| zebrafish | GYSIPDLLARLLQIERLDAVETLCCDILSGTQNCTNPPLSSRCASV                 | 459 |
|           | *****:*****.***:*** **.. . :.*****                             |     |

**Supplementary Figure 9. Sequence alignment of fgfr1a of channel catfish (channel) with that of zebrafish.**

|           |                                                                |     |
|-----------|----------------------------------------------------------------|-----|
| channel   | VAFVHRHCPSSPSTEQLESCVYGELLQATSSVVEEHDEEHNEGHAADVLGSSSPASAGPQ   | 60  |
| zebrafish | -----                                                          |     |
| channel   | QAGQPRARTSGYGTVSPVSPSGRADMVRSRPCLRQDERIWNGLARVSVRTSGYGTVSPVS   | 120 |
| zebrafish | -----MIMK-----TLLLLISVLLT-----                                 | 15  |
|           | *: . . * : ** :                                                |     |
| channel   | PSGRADMERSRPCLRQDEWIWNCLLRVALLETAVYTLYEGDKLELKCRSKEEPQEVSWTK   | 180 |
| zebrafish | ---QALQSQGRPAIQDE-----APAETSYTLDSEKLELSCKAKEDTQKVTWTK          | 62  |
|           | :* . :.*.*.:::: * *.: *** .*:****.*:***:.*:***                 |     |
| channel   | DQVLLADGEHHLRNGQLEIEGVELADSGLYGCFARGPAGNHTEYFNVNVTYALASSED     | 240 |
| zebrafish | DLVPLVDGEHTRLRNDQMEIEKVEPADSGLYACFAQGLNSNHTEYFNI SVT-----DE    | 115 |
|           | * * * .*****:***.*:*** ** *****.****:* .*****:.* * :           |     |
| channel   | DDDESSEETKQSSSQKLLSNSQELSPAPEWAQPKMEKKLHAVPASRTVRFRCPSIG       | 300 |
| zebrafish | EDEVSSSEAK-----LSDNQL-PMAPVWAQPKMEKKLHAVPASKTVKFRQANG          | 167 |
|           | :*: :****:* * * .*: * * * *****:***:*** : *                    |     |
| channel   | NPTPTLKWLNKNGKEFKKQRIIGGFKLRESLWAIIMDSVVPDCKGNVTCVENKYGSINHT   | 360 |
| zebrafish | NPTPTLKWLNKNGKEFKRDQRIIGGFKVREHMWTIIMESVVPDCKGNVTCVENKYGSINHT  | 227 |
|           | *****:*****:*****:* * :*:***:*****:*****:***:*****             |     |
| channel   | YQLDVVERSPHRPILQAGLPANRTAVVGSDFEVECKVFSDFQPHIQWLKHIEVNGSKVGE   | 420 |
| zebrafish | YQLDVVERSPHRPILQAGLPANRTAVVGSDFEVECKVFSDFQPHIQWLKHIEVNGSRYGP   | 287 |
|           | *****: *                                                       |     |
| channel   | DGLPYVKVLKHSQVNSDQTQVLTLHNVTTEESGEYICKVSNYIGQANQSAWLTVTKYAST   | 480 |
| zebrafish | DGLPYVRALK-----                                                | 297 |
|           | *****:.* *                                                     |     |
| channel   | ETAGVNTTDKEMEVLQKLVNSLEDAGVYTCLAGNSIGHSHSAWLTVYALPPTPLPNQT     | 540 |
| zebrafish | -TAGVNTTDKEMEVLQIRNVNSLEDAGEYTCLAGNSIGHSHSAWLTVYKAVPPTQLPNQT   | 356 |
|           | *****:***** *****:*** *****                                    |     |
| channel   | YLEVLIYCVGFFLICVMVVIQAVLVMHSSAKKSDFNSQMAVHKLAKSIPLRRQV--SVDS   | 598 |
| zebrafish | YLEVLIYCVGFFLICVMVGTAVLAKMHSSAKKSDFNSQLAVHKLAKSIPLRRQVTVSVD    | 416 |
|           | *****:***** *****:*****:***** *****                            |     |
| channel   | SSSMHSGVMLVRPSRLSSSGSPMLSGVSEYELPQDPRWELPRDKLVLGKPLGEGCFGQV    | 658 |
| zebrafish | SSSMHSGMLVRPSRLSSSGSPMLSGVSEYELPQDPRWEVQRDLVLGKPLGEGCFGQVM     | 476 |
|           | ***** *****: **:*****:*****:                                   |     |
| channel   | MGEVLGMDKDKPNRVTKVAVKMLKSDATEKDLSDLI SEMEMMKIIGKHKNI INLLGACTQ | 718 |
| zebrafish | MAEAMGMDKEKPNRITKVAVKMLKSDATEKDLSDLI SEMEMMKIIGKHKNI INLLGACTQ | 536 |
|           | * . * :***:***:*****:*****:*****:*****:*****:*****             |     |
| channel   | DGPLYVIVEYASKGNLREYLRARRPPGMEYCYNPDQVPVETVSVKDLVSCAYQVARGMEY   | 778 |
| zebrafish | DGPLYVIVEFAAKGNLREYLRVRRPPGMEYCYNPDQVPVENMSIKDLVSCAYQVARGMEY   | 596 |
|           | *****:*.***** .*****:***** .*:*****:*****                      |     |
| channel   | LASKKCIHRDLAARNVLVTEDNVMKIADFGGLARDIHHIDYKKTNGRLPVKWMPEALF     | 838 |
| zebrafish | LASKKCIHRDLAARNVLVTEDNVMKIADFGGLARDIHHIDYKKTNGRLPVKWMPEALF     | 656 |
|           | *****:*****:*****:*****:*****:*****:*****:*****                |     |
| channel   | DRIYTHQSDVWSFGVLLWEIFTLGGSPYGPVVEELFKLLKEGHRMDRPSCTHELYMMM     | 898 |
| zebrafish | DRIYTHQSDVWSFGVLLWEIFTLGGSPYGPVVEELFKLLKEGHRMDRPSCTHELYMMM     | 716 |
|           | *****:*****:*****:*****:*****:*****:*****:*****                |     |
| channel   | RDCWHAAPSQRPTFKQLVEDLDRTLSTNSQYELDLVSLDQYSPSPFDRSSTCSSGED      | 958 |
| zebrafish | RDCWHAVPSQRPTFKQLVEDLDRTLSTNSQYELDLVSLDQYSPSPFDRSSTCSSGED      | 776 |
|           | ***** .*****:*****:*****:*****:*****:*****                     |     |
| channel   | SVFSHEPSADEPCLPKFPPNPNRVVVSFKKR                                | 988 |
| zebrafish | SVFSDAGADEPCLPKFPPNPNRGVAFKKR                                  | 806 |
|           | *****:.* *****:*** *:***                                       |     |

**Supplementary Figure 10. Sequence alignment of Lef1 of channel catfish (channel) with that of zebrafish.**

|           |                                                               |     |
|-----------|---------------------------------------------------------------|-----|
| channel   | MPQLAGGGGGDPELCADEMIPFKDEGDPQKEQSF AEITNSEEEGDLAELKSSLVNESE   | 60  |
| zebrafish | MPQLSGGGGGDPELCADEMIPFKDEGDPHKEQIFAEISHSEEEGDLAEIKSSLVNETE    | 60  |
|           | ****:*****:*** ****:*****:*****:*                             |     |
| channel   | TSPN-NSHDAARQSQITPDSYHEKHKREHPDDGKLQDLYSKGHAYSGYPSYIMMTNMNNEP | 119 |
| zebrafish | ISPNSNSHDAARQSQITPDSYHEKHRDHPDDGKLQDLYSKGHPYPSYPGYIMMTNMNNEP  | 120 |
|           | *** *****:*****.*.*.*****                                     |     |
| channel   | YMNNGSLSPMPRTSNKVPVQPSHAVHPLTPLITYSDEHFAPGPHSGHHPQDSK---G     | 175 |
| zebrafish | YMNNGSLSPPIPRTSNKVPVQPSHAVHPLTPLITYSDEHFAPGPHSGHHPQDVNPKQAG   | 180 |
|           | *****:*****:*                                                 |     |
| channel   | MPRHHPGDIPNFYSLSPGGVQLTPPLGWFPHHMVPGPPGPHATGIPHPAIVNPQVKHE    | 235 |
| zebrafish | MPRHHPGDIPNFYPLSPGGVQMTPLGWFSHHMVPGPPGPHATGIPHPAIVNPQVKQE     | 240 |
|           | *****.******:*****.******:*                                   |     |
| channel   | PPHETDLMHMKPQHEQRKEQEPKRPHIKKPLNAFMLYMKEMRANVVAECTLKESAAINQI  | 295 |
| zebrafish | --HDTDLMHMKPQHEQRKEQEPKRPHIKKPLNAFMLYMKEMRANVVAECTLKESAAINQI  | 298 |
|           | *:*****                                                       |     |
| channel   | LGRRWHALSREEQAKYYELARKERQLHMQLYPGWSARDNYGKKKKRKRKLEQESASGTAQ  | 355 |
| zebrafish | LGRRWHALSREEQAKYYELARKERQLHMQLYPGWSARDNYGKKKKRKRKLEQEPASGTGQ  | 358 |
|           | *****:***.***.*                                               |     |
| channel   | RMKTAYI                                                       | 362 |
| zebrafish | RMKTAYI                                                       | 365 |
|           | *****                                                         |     |

**Supplementary Figure 11. Sequence alignment of TCF7 of channel catfish (channel) with that of zebrafish.**

```

channel      KMPQLNSGGDDLGADEMIAFKDEGEQDEKIEENAFTEGDLADLKSSLVNESEISQNSH 60
zebrafish   -MPQLNGGGDDLGADEMIAFKDEGDHEEKIRESAFTESDLADLKSSLVSETEISQS-- 57
          *****
channel     PPVVRTGHQEEQRVYEEKHREHLEHLNDVPKPQDAGMYKASTYSGYPFLMLPEHYHPNGQ 120
zebrafish   PAVIRRGQDEQRIYSDKR---EHLDDVPKHHDGGMYKAP-YSGYPFMLLPEPYLPNGP 112
          *.:* *:*:***:*.:~:      ***:***: :*.****. ***** * **
channel     VSPSANKVAVVQQPHGMHPLTSLLPYSNEHFNPSPSHLTSDFSQKPGGVGQITPSMGWQS 180
zebrafish   VSPPSNKVSVVQQ--GMHPLTPLLPI--EHFNPSPTHMPTDGGQKPG-----VHRHQT 161
          ***.:***:*** *****.**** *****:~:~:~*.****
          *
channel     QPVYPLSSCGFRQPYSSSLASNSSYSRFSHSLIMGPSGMHPTGIPHPAIVPSSGRQEHQ 240
zebrafish   QEIS----GFYSLPQQGITP--SMNWFSHSLMLQ-SGMHPTGIPHPAIVPPSGKQEHQ 213
          * :      ** . . . : : . * . *****:~: *****.***:*****
channel     FD---IKPHPESKREREKPKPKVIKKPLNAFMLYMKEMRAKVIAECTLKESAAINQILGR 296
zebrafish   FDRSIYNKSHAEAKREKEPKPKVIKKPLNAFMLYMKEMRAKVIAECTLKESAAINQILGR 273
          **      * . * . :***:*****
channel     RWHALTREEQAKYYELARKERQLHMQLYPSWSARDNY---GKKKRRKRDQQDSAT--- 349
zebrafish   RWHALTREEQAKYYELARKERQLHVQLYPSWSARDNYVSALGKKKRRKRDQQDSSTGPG 333
          *****:***** *****:~:
channel     -----
zebrafish   SPKKCRARFGLNQOTDWCGPCR 355

```

## Supplementary Tables

**Supplementary Table 1. Sequence inputs for the channel catfish reference genome assembly.**

| <b>Library</b>      | <b>Insert size (bp)</b> | <b>Average read length (bp)</b> | <b>Number reads</b> | <b>Sequence length (Mb)</b> | <b>Genome coverage</b> | <b>Usage</b> |
|---------------------|-------------------------|---------------------------------|---------------------|-----------------------------|------------------------|--------------|
| PCR-free paired end | 400                     | 118                             | 749.5 M             | 88,627                      | 88 X                   | Assembly     |
| 3kb mate pairs      | 3,000                   | 102                             | 17.8 M              | 1,834                       | 53X clonal             | Scaffolding  |
| 8kb mate pairs      | 7,800                   | 103                             | 4.7 M               | 484                         | 36X clonal             | Scaffolding  |
| 34 kb fosmid pairs  | 34,500                  | 95                              | 1.6 M               | 157                         | 54X clonal             | Scaffolding  |
| PacBio              | 8-10 kb                 | 1,637                           | 3.3 M               | 5,424                       | 5.4 X                  | Gap filling  |



**Supplementary Table 2. Improvement of assembly contiguity with PCR-Free PE libraries and gap closing with Illumina and PacBio sequences.**

|                           | PCR-based PE libraries |                | PCR-Free PE library |                |
|---------------------------|------------------------|----------------|---------------------|----------------|
|                           | Pre-gap close          | Post-gap close | Pre-gap close       | Post-gap close |
| Total number of gaps      | 91,749                 | 46,528         | 85,860              | 24,025         |
| Total gap length (bp)     | 28.3M                  | 23.7M          | 16.0M               | 11.6M          |
| Mean gap length (bp)      | 312                    | 509            | 186                 | 483            |
| Scaffolds with gaps       | 7,475                  | 7,372          | 1,726               | 1,429          |
| Mean Scaffold Length (bp) | 20,008                 | 19,932         | 37,112              | 36,869         |
| Mean Contig Length (bp)   | 6,136                  | 9,623          | 7,235               | 17,085         |
| Contig L50 (bp)           | 14,213                 | 30,290         | 17,423              | 76,761         |
| Contig L95 (bp)           | 1,611                  | 2,246          | 2,366               | 7,742          |
| Contig L99 (bp)           | 563                    | 623            | 654                 | 966            |

Statistics reflect automated assembly prior to manual scaffold correction.

**Supplementary Table 3. Scaffolding using BAC end sequences (BES) and full length transcripts.**

|                  |                                                                     |        |
|------------------|---------------------------------------------------------------------|--------|
| BES              | Total number of BES                                                 | 63,388 |
|                  | Number of BES pairs                                                 | 25,677 |
|                  | Number of BES uniquely mapped to repeat-masked reference sequence   | 7,725  |
|                  | BES uniquely mapped to same scaffolds                               | 7,471  |
|                  | BES uniquely mapped to different scaffolds                          | 254    |
|                  | Number of the scaffold pairs with at least two pairs of BES matches | 39     |
|                  | Number of scaffolds reduced by BES                                  | 21     |
| Gene transcripts | Number of cDNAs that match $\geq 2$ scaffolds                       | 94     |
|                  | Number of scaffolds reduced by using cDNA                           | 136    |

**Supplementary Table 4. Definition of channel catfish chromosomes based on aggregate length of scaffolds in genetic linkage group (LG).** Statistics do not include the inter-scaffold gaps.

| <b>Chromosome</b> | <b># of scaffolds</b> | <b>Physical size</b> | <b># of genes</b> | <b>LG number</b> | <b>Genetic size (cM)</b> | <b>Average kb/cM</b> | <b>Average gene/Mb</b> |
|-------------------|-----------------------|----------------------|-------------------|------------------|--------------------------|----------------------|------------------------|
| 1                 | 25                    | 37,506,655           | 1,233             | 1                | 139.5                    | 268.9                | 32.9                   |
| 2                 | 45                    | 37,241,186           | 1,295             | 3                | 169.7                    | 219.5                | 34.8                   |
| 3                 | 32                    | 34,901,054           | 1,091             | 6                | 163.3                    | 213.7                | 31.3                   |
| 4                 | 39                    | 34,498,793           | 990               | 4                | 128.1                    | 269.3                | 28.7                   |
| 5                 | 41                    | 32,117,789           | 1,137             | 11               | 152.7                    | 210.3                | 35.4                   |
| 6                 | 10                    | 32,336,212           | 914               | 17               | 138.2                    | 234.0                | 28.3                   |
| 7                 | 45                    | 32,227,861           | 1,152             | 8                | 117.3                    | 274.7                | 35.7                   |
| 8                 | 20                    | 30,408,258           | 966               | 9                | 146.9                    | 207.0                | 31.8                   |
| 9                 | 15                    | 30,148,133           | 986               | 16               | 145.3                    | 207.5                | 32.7                   |
| 10                | 19                    | 29,044,225           | 907               | 20               | 126.0                    | 230.5                | 31.2                   |
| 11                | 12                    | 28,206,976           | 801               | 7                | 102.1                    | 276.3                | 28.4                   |
| 12                | 13                    | 28,144,356           | 1,007             | 12               | 104.8                    | 268.6                | 35.8                   |
| 13                | 21                    | 27,389,953           | 943               | 5                | 110.2                    | 248.5                | 34.4                   |
| 14                | 31                    | 26,696,778           | 847               | 18               | 114.8                    | 232.6                | 31.7                   |
| 15                | 13                    | 26,074,281           | 932               | 15               | 115.7                    | 225.4                | 35.7                   |
| 16                | 10                    | 25,964,284           | 843               | 25               | 127.6                    | 203.5                | 32.5                   |
| 17                | 30                    | 25,913,994           | 834               | 22               | 68.4                     | 378.9                | 32.2                   |
| 18                | 11                    | 24,511,808           | 911               | 13               | 131.1                    | 187.0                | 37.2                   |
| 19                | 39                    | 23,654,134           | 744               | 23               | 93.3                     | 253.5                | 31.5                   |
| 20                | 14                    | 21,426,798           | 799               | 2                | 116.2                    | 184.4                | 37.3                   |
| 21                | 16                    | 20,985,506           | 713               | 21               | 110.3                    | 190.3                | 34.0                   |
| 22                | 22                    | 19,855,691           | 693               | 26               | 101.2                    | 196.2                | 34.9                   |
| 23                | 4                     | 18,814,537           | 658               | 19               | 118.9                    | 158.2                | 35.0                   |
| 24                | 15                    | 19,557,860           | 734               | 24               | 106.9                    | 183.0                | 37.5                   |
| 25                | 10                    | 19,456,751           | 679               | 28               | 114.1                    | 170.5                | 34.9                   |
| 26                | 27                    | 19,063,806           | 744               | 10               | 105.8                    | 180.2                | 39.0                   |
| 27                | 14                    | 18,540,812           | 553               | 27               | 113.7                    | 163.1                | 29.8                   |
| 28                | 22                    | 18,160,844           | 750               | 14               | 113.8                    | 159.6                | 41.3                   |
| 29                | 19                    | 15,253,832           | 525               | 29               | 109.5                    | 139.3                | 34.4                   |
| Assigned          | 634                   | 758,103,167          | 25,381            | -                | 3505.4                   | 218.4                | 33.8                   |
| Unassigned        | 9,340                 | 25,091,658           | 1,280             | -                | -                        | -                    | -                      |
| <b>Total</b>      | <b>9,974</b>          | <b>783,194,825</b>   | <b>26,661</b>     |                  |                          |                      |                        |

**Supplementary Table 5. Assessing the completeness of the channel catfish reference genome.** The completeness of the channel catfish reference genome was assessed by *in silico* mapping of 167X genome coverage of re-sequencing reads to the reference genome.

| Mapping statistics    | Number of contigs | % contigs | % Sequence length |
|-----------------------|-------------------|-----------|-------------------|
| Mapped to scaffolds   | 483,512           | 93.9      | 99.00             |
| Mapped to degenerates | 11,250            | 2.2       | 0.37              |
| Total mapped          | 494,762           | 96.1      | 99.37             |
| Unmapped contigs      | 20,289            | 3.9       | 0.63              |
| Total contigs         | 515,051           | 100.0     | 100.00            |

**Supplementary Table 6. Assessment of the completeness of the channel catfish reference genome sequence through gene content contained in the sequenced fish genomes.**

| <b>Species</b>      | <b># unique genes</b> | <b>Catfish+*</b> | <b>Catfish-<sup>§</sup></b> | <b>Zebrafish+**</b> | <b>Zebrafish-<sup>§§</sup></b> |
|---------------------|-----------------------|------------------|-----------------------------|---------------------|--------------------------------|
| <b>Catfish</b>      | 26,661                | -                | -                           | 723                 | 970                            |
| <b>Zebrafish</b>    | 26,415                | 970              | 723                         | -                   | -                              |
| <b>Cave fish</b>    | 23,042                | 1,178            | 373                         | 791                 | 270                            |
| <b>Atlantic cod</b> | 20,083                | 1,805            | 675                         | 1,204               | 603                            |
| <b>Fugu</b>         | 18,518                | 1,923            | 198                         | 1,375               | 132                            |
| <b>Medaka</b>       | 19,682                | 1,812            | 919                         | 1,330               | 868                            |
| <b>Platyfish</b>    | 20,379                | 1,437            | 384                         | 923                 | 276                            |
| <b>Sole</b>         | 21,485                | 1,205            | 533                         | 772                 | 482                            |
| <b>Spotted gar</b>  | 18,341                | 1,272            | 463                         | 832                 | 397                            |
| <b>Stickleback</b>  | 20,785                | 1,719            | 1,042                       | 1,134               | 981                            |
| <b>Tetraodon</b>    | 19,595                | 2,095            | 358                         | 1,485               | 285                            |
| <b>Tilapia</b>      | 21,437                | 1,600            | 309                         | 1,112               | 254                            |
| <b>Amazon molly</b> | 23,614                | 1,210            | 463                         | 786                 | 431                            |

\*Catfish+ indicates the number of genes found in channel catfish but not from the species under comparison;

<sup>§</sup> Catfish- indicates the number of genes not found in channel catfish but found from the species under comparison.

\*\*Zebrafish+ indicates the number of genes found in zebrafish but not from the species under comparison;

<sup>§§</sup> Zebrafish- indicates the number of genes not found in zebrafish but found from the species under comparison;

**Supplementary Table 7. Comparative Analysis for orthologous chromosomes between channel catfish and zebrafish using single copy genes.**

Z1 to Z25 represent zebrafish chromosomes, C1 to C29 represent catfish chromosomes.

The number in the cell is the percentage of catfish genes on a chromosome that are homologous to zebrafish genes on the corresponding zebrafish chromosome. Percentages >5% are highlighted in yellow.

|     | Z1 | Z2 | Z3 | Z4 | Z5 | Z6 | Z7 | Z8 | Z9 | Z10 | Z11 | Z12 | Z13 | Z14 | Z15 | Z16 | Z17 | Z18 | Z19 | Z20 | Z21 | Z22 | Z23 | Z24 | Z25 |
|-----|----|----|----|----|----|----|----|----|----|-----|-----|-----|-----|-----|-----|-----|-----|-----|-----|-----|-----|-----|-----|-----|-----|
| C26 | 83 | 1  | 1  | 1  | 1  | 1  | 0  | 0  | 4  | 0   | 1   | 0   | 0   | 1   | 1   | 0   | 0   | 0   | 1   | 0   | 0   | 0   | 0   | 0   | 1   |
| C29 | 53 | 1  | 1  | 0  | 0  | 1  | 19 | 1  | 1  | 2   | 1   | 0   | 11  | 1   | 0   | 1   | 0   | 0   | 0   | 1   | 0   | 3   | 1   | 0   | 0   |
| C20 | 0  | 59 | 1  | 1  | 1  | 1  | 0  | 1  | 1  | 1   | 0   | 0   | 0   | 0   | 18  | 7   | 0   | 0   | 0   | 0   | 0   | 1   | 0   | 3   | 1   |
| C2  | 0  | 1  | 57 | 1  | 0  | 1  | 1  | 1  | 1  | 0   | 1   | 1   | 0   | 6   | 0   | 1   | 0   | 0   | 1   | 24  | 0   | 0   | 0   | 1   | 0   |
| C19 | 0  | 0  | 0  | 78 | 1  | 0  | 1  | 0  | 1  | 1   | 0   | 0   | 0   | 1   | 0   | 1   | 0   | 1   | 3   | 0   | 0   | 1   | 0   | 0   | 3   |
| C28 | 0  | 1  | 1  | 0  | 85 | 0  | 1  | 1  | 0  | 0   | 0   | 0   | 0   | 1   | 1   | 0   | 0   | 0   | 0   | 0   | 0   | 1   | 0   | 1   | 1   |
| C22 | 0  | 0  | 0  | 0  | 88 | 0  | 2  | 1  | 0  | 1   | 0   | 0   | 0   | 0   | 0   | 0   | 0   | 1   | 1   | 0   | 2   | 0   | 0   | 0   | 0   |
| C11 | 2  | 1  | 1  | 1  | 1  | 81 | 1  | 0  | 1  | 0   | 0   | 0   | 0   | 0   | 1   | 0   | 0   | 0   | 0   | 0   | 1   | 2   | 2   | 1   | 0   |
| C12 | 0  | 0  | 18 | 1  | 0  | 35 | 1  | 0  | 2  | 0   | 0   | 0   | 0   | 0   | 0   | 3   | 0   | 0   | 32  | 1   | 1   | 1   | 0   | 1   | 0   |
| C7  | 1  | 42 | 1  | 1  | 1  | 1  | 46 | 1  | 0  | 0   | 0   | 0   | 0   | 0   | 1   | 0   | 0   | 0   | 1   | 1   | 1   | 1   | 1   | 1   | 0   |
| C27 | 0  | 1  | 1  | 0  | 1  | 1  | 54 | 0  | 1  | 1   | 8   | 0   | 0   | 0   | 0   | 1   | 0   | 1   | 0   | 0   | 0   | 26  | 1   | 0   | 2   |
| C5  | 0  | 1  | 1  | 1  | 0  | 1  | 0  | 85 | 1  | 0   | 1   | 0   | 0   | 0   | 0   | 0   | 1   | 0   | 0   | 0   | 1   | 1   | 1   | 0   | 1   |
| C6  | 2  | 1  | 1  | 1  | 1  | 2  | 1  | 0  | 84 | 0   | 0   | 0   | 0   | 0   | 0   | 0   | 0   | 0   | 0   | 1   | 0   | 1   | 1   | 1   | 0   |
| C16 | 1  | 1  | 0  | 1  | 1  | 1  | 1  | 1  | 0  | 87  | 1   | 0   | 0   | 1   | 1   | 0   | 0   | 1   | 0   | 1   | 0   | 0   | 0   | 0   | 0   |
| C21 | 0  | 0  | 0  | 0  | 0  | 1  | 1  | 2  | 0  | 0   | 66  | 0   | 0   | 0   | 0   | 0   | 0   | 0   | 1   | 0   | 0   | 23  | 2   | 0   | 0   |
| C13 | 0  | 0  | 3  | 0  | 0  | 0  | 0  | 0  | 0  | 0   | 0   | 88  | 2   | 0   | 0   | 0   | 2   | 0   | 0   | 0   | 0   | 0   | 0   | 0   | 0   |
| C3  | 17 | 0  | 0  | 0  | 0  | 1  | 0  | 0  | 0  | 0   | 0   | 1   | 66  | 0   | 0   | 0   | 3   | 4   | 0   | 0   | 0   | 0   | 0   | 0   | 0   |
| C8  | 1  | 0  | 0  | 1  | 0  | 0  | 1  | 0  | 0  | 0   | 0   | 0   | 0   | 63  | 0   | 0   | 0   | 0   | 0   | 0   | 1   | 0   | 0   | 0   | 26  |
| C17 | 0  | 10 | 0  | 1  | 1  | 1  | 0  | 1  | 0  | 2   | 0   | 0   | 0   | 0   | 78  | 1   | 0   | 0   | 0   | 0   | 1   | 0   | 0   | 0   | 0   |
| C1  | 0  | 2  | 1  | 0  | 0  | 1  | 0  | 0  | 0  | 0   | 0   | 0   | 0   | 0   | 1   | 58  | 0   | 0   | 3   | 0   | 0   | 1   | 0   | 29  | 0   |
| C9  | 0  | 0  | 0  | 0  | 0  | 0  | 0  | 0  | 0  | 1   | 0   | 1   | 1   | 0   | 0   | 0   | 83  | 0   | 2   | 4   | 0   | 0   | 0   | 0   | 0   |
| C4  | 0  | 0  | 0  | 2  | 1  | 1  | 1  | 0  | 1  | 1   | 1   | 0   | 2   | 1   | 0   | 0   | 0   | 84  | 0   | 0   | 0   | 1   | 0   | 0   | 1   |
| C24 | 0  | 1  | 31 | 0  | 0  | 1  | 0  | 0  | 0  | 0   | 0   | 0   | 0   | 0   | 0   | 2   | 0   | 0   | 60  | 1   | 0   | 0   | 0   | 0   | 0   |
| C25 | 0  | 1  | 1  | 1  | 0  | 0  | 1  | 1  | 0  | 0   | 0   | 0   | 1   | 0   | 0   | 1   | 2   | 1   | 0   | 86  | 0   | 2   | 0   | 0   | 0   |
| C18 | 1  | 0  | 0  | 0  | 1  | 1  | 1  | 1  | 1  | 0   | 1   | 0   | 0   | 1   | 1   | 1   | 1   | 1   | 1   | 0   | 0   | 85  | 0   | 0   | 0   |
| C10 | 0  | 2  | 1  | 1  | 0  | 1  | 29 | 0  | 1  | 0   | 26  | 0   | 1   | 0   | 0   | 0   | 0   | 1   | 0   | 0   | 0   | 30  | 1   | 0   | 1   |
| C15 | 1  | 2  | 1  | 1  | 0  | 1  | 0  | 0  | 0  | 0   | 2   | 0   | 0   | 0   | 1   | 1   | 1   | 0   | 0   | 1   | 0   | 0   | 85  | 1   | 0   |
| C23 | 0  | 1  | 0  | 0  | 0  | 0  | 0  | 0  | 0  | 0   | 1   | 0   | 0   | 0   | 0   | 40  | 0   | 0   | 2   | 0   | 0   | 0   | 0   | 49  | 0   |
| C14 | 0  | 0  | 0  | 10 | 0  | 0  | 2  | 0  | 0  | 1   | 0   | 0   | 1   | 15  | 1   | 1   | 1   | 1   | 8   | 0   | 1   | 0   | 0   | 1   | 51  |

**Supplementary Table 8. Comparative analysis of channel catfish and zebrafish genes.**

| <b>Relationship type</b>                  | <b>Catfish</b>    | <b>Core relationship</b> | <b>Zebrafish</b>  | <b>Ratio</b> |
|-------------------------------------------|-------------------|--------------------------|-------------------|--------------|
| <b>One to one</b>                         | 7,787             | 7,787                    | 7,787             | 1:1          |
| <b>One to two</b>                         | 1,137             | 1,137                    | 2,274             | 1:2          |
| <b>One to many</b>                        | 291               | 291                      | 1,410             | 1:4.85       |
| <b>Two to one</b>                         | 1,924             | 962                      | 962               | 2:1          |
| <b>Two to two</b>                         | 2,280             | 1,140                    | 2,280             | 1:1          |
| <b>Two to many</b>                        | 822               | 411                      | 1,527             | 1:1.86       |
| <b>Many to one</b>                        | 1,215             | 292                      | 292               | 4.16:1       |
| <b>Many to two</b>                        | 1,674             | 408                      | 816               | 2.05:1       |
| <b>Many to many</b>                       | 8,521             | 1,068                    | 8,136             | 1.05:1       |
| <b>Subtotal orthologs</b>                 | 25,651            | 13,496                   | 25,484            | 1.01:1       |
| <b>In-paralogs</b>                        | 143 (51 clusters) |                          | 243 (70 clusters) |              |
| <b>Single copy species-specific genes</b> | 867               | -                        | 688               | -            |
| <b>Total coding-gene</b>                  | 26,661            | -                        | 26,415            | -            |

**Supplementary Table 9. Comparison of duplicated genes among zebrafish, fugu and channel catfish.**

| Species   | Duplicated clusters | Total genes | Average copy number |
|-----------|---------------------|-------------|---------------------|
| Catfish   | 3,688               | 19,435      | 5.3                 |
| Fugu      | 3,262               | 12,673      | 3.9                 |
| Zebrafish | 4,255               | 20,831      | 4.9                 |



**Supplementary Table 10. Genes commonly shared by all sequenced teleost fish species but absent from cartilaginous fish and jawless species, with high levels of expression in the swimbladder.**

The gene expression levels in various tissues were determined in RPKM by RNA-Seq analysis of publicly available datasets: swimbladder (ERR023143 and ERR023148), skin (SRP013931), intestine (SRR1562529), and liver (SRR891504). The mRNA sequences from the total of 26,459 zebrafish genes were used as reference sequences for RNA-Seq analysis using CLC Genomics Workbench with default settings. The mRNA sequences were retrieved from Ensembl database (v78); only the longest transcripts were selected from each of those genes had isoforms.

| Zebrafish Ensembl Gene ID | Gene Name          | Swimbladder |       | Skin  |      | Intestine |      | Liver |      |
|---------------------------|--------------------|-------------|-------|-------|------|-----------|------|-------|------|
|                           |                    | Reads       | RPKM  | Reads | RPKM | Reads     | RPKM | Reads | RPKM |
| ENSDARG00000071014        | s100u              | 4310        | 205.6 | 28110 | 39.6 | 1234      | 20.7 | 92    | 0.7  |
| ENSDARG00000097712        | si:ch1073-443n13.2 | 195         | 18.3  | 1287  | 3.6  | 36        | 1.2  | 31    | 0.5  |
| ENSDARG00000094977        | si:ch211-156j22.4  | 319         | 12.0  | 3356  | 3.7  | 51        | 0.7  | 17    | 0.1  |
| ENSDARG00000092856        | si:ch211-210c8.7   | 179         | 22.2  | 2332  | 8.5  | 52        | 2.3  | 106   | 2.1  |
| ENSDARG00000086317        | si:ch211-67e16.4   | 239         | 11.7  | 2459  | 3.6  | 107       | 1.8  | 92    | 0.7  |
| ENSDARG00000070972        | si:ch211-81a5.8    | 62          | 6.2   | 88    | 0.3  | 1         | 0.04 | 0     | 0    |
| ENSDARG00000094422        | si:dkey-12112.1    | 8295        | 634.9 | 15433 | 34.9 | 4         | 0.1  | 1     | 0.01 |
| ENSDARG00000076972        | si:dkey-208k22.3   | 3730        | 175.8 | 12630 | 17.6 | 425       | 7.0  | 23    | 0.2  |
| ENSDARG00000092123        | si:dkey-20d21.12   | 143         | 13.2  | 946   | 2.6  | 2         | 0.07 | 14    | 0.2  |
| ENSDARG00000093997        | si:dkey-9i23.15    | 1107        | 87.4  | 8303  | 19.4 | 357       | 9.9  | 116   | 1.4  |
| ENSDARG00000077303        | zgc:174863         | 5315        | 304.3 | 36858 | 62.3 | 2557      | 51.4 | 322   | 2.9  |

**Supplementary Table 11. A list of seven genes that are both present and expressed in pleco, but are not expressed in channel catfish.**

| <b>Accession</b> | <b>Gene description</b>                              |
|------------------|------------------------------------------------------|
| NP_001070846.1   | Nuclear-interacting partner of ALK                   |
| XP_001339495.3   | Protein FAM118B-like                                 |
| NP_001138712.1   | Secretory calcium-binding phosphoprotein 1 precursor |
| NP_001138708.1   | Secretory calcium-binding phosphoprotein 5           |
| XP_002942726.1   | Uncharacterized protein LOC100495238                 |
| XP_005452781.1   | Uncharacterized protein LOC102077212                 |
| XP_005460634.1   | Uncharacterized protein LOC102080148                 |

**Supplementary Table 12. Primers used for analysis of SCPP gene expression in zebrafish.**

| <b>Gene</b>    | <b>Forward (5' to 3')</b> | <b>Reverse (5' to 3')</b> |
|----------------|---------------------------|---------------------------|
| <b>SPARCL1</b> | AAGATGCAGAGTGACCAGGC      | TGGATTCATCCCCACCAAGC      |
| <b>SPP1</b>    | GCCTCCATCATCATCGTAA       | CCGTCTGTCGTCTAACTC        |
| <b>SCPP1</b>   | GCTCTGAATCACTTGAATCTG     | TGCTGTTACTGTTGCTGTA       |
| <b>ODAM</b>    | CCTGTACAGCTGATGCCCAA      | CAGGCACAGACGTTGCTTTC      |
| <b>SCPP5</b>   | AAGTACTCGCTCCCCAAAGC      | AGGTGGCTGTTGAGGAACTG      |
| <b>SCPP6</b>   | AGACCACAACAGGGGCAAAA      | ACGGCCCATGTTCTGAAGTT      |
| <b>SCPP7</b>   | TCGTCATTGGAGTTGCTTA       | GCTGAGGAATCTCGTGTT        |
| <b>SCPP8</b>   | TCTATCACTGGACAAGAACA      | AATCATCAAGCATTTCGGAAG     |
| <b>SCPP9</b>   | GGTGCTGCGGTTATAGGACA      | ATACGGCAAGCCCCCATTAG      |
| <b>FA93E10</b> | TGACAGTGGCAGTAATGAG       | AGCAACAGCACCATATCC        |
| <b>GSP37</b>   | CCACAACGAGCACAAAT         | GAGCAGTGAAGAGATGATACA     |
| <b>RPL13a</b>  | TCTGGAGGACTGTAAGAGGTATGC  | AGACGCACAATCTTGAGAGCAG    |
